# Supplementary material for: Effect of the black chokeberry (Aronia melanocarpa (Michx.) Elliott) juice acquisition method on the content of polyphenols and antioxidant activity
Source: PLoS One. 2019 Jul 18;14(7):e0219585. doi: 10.1371/journal.pone.0219585 (PMC6638934; doi:10.1371/journal.pone.0219585)
Supplement: S1 File — (XLSX) [file pone.0219585.s001.xlsx]

## Sheet: Arkusz1
				Piston pres, different pretreatment
									Fig 3	Table 2	Table 5	Table 8	Fig 6	Fig 9
					Press	Shredded/unshredded	Pretreatment	Sample code	Efficiency	Bx	pH	Density	TPC mg/100ml	DPPH %
					Piston press	A	C	PP+A+C	35.436	20.7	3.22	1.078	355.213	91.8919
					Piston press	A	C	PP+A+C	35.9316	20.6	3.21	1.075	369.601	92.0608
					Piston press	A	C	PP+A+C	35.3156	20.7	3.21	1.077	362.407	91.5165
					Piston press	A	C	PP+A+C	35.5611	20.6667	3.21333	1.07667	362.407	91.8231	Mean
					Piston press	A	C	PP+A+C	0.326508	0.057735	0.0057735	0.00152753	7.19416	0.278622	SD
					Piston press	A	F	PP+A+F	46.4092	17.8	3.37	1.06	279.961	89.6959
					Piston press	A	F	PP+A+F	47.0716	17.7	3.35	1.063	283.115	89.8649
					Piston press	A	F	PP+A+F	49.6571	17.7	3.34	1.064	281.538	89.3315
					Piston press	A	F	PP+A+F	47.7126	17.7333	3.35333	1.06233	281.538	89.6308	Mean
					Piston press	A	F	PP+A+F	1.71626	0.057735	0.0152753	0.00208167	1.57705	0.272588	SD
					Piston press	A	E	PP+A+E	31.5529	19.6	3.25	1.076	369.887	91.2162
					Piston press	A	E	PP+A+E	34.6712	19.4	3.24	1.071	383.386	91.0473
					Piston press	A	E	PP+A+E	33.2005	19.5	3.26	1.073	375.937	90.6761
					Piston press	A	E	PP+A+E	33.1415	19.5	3.25	1.07333	376.403	90.9799	Mean
					Piston press	A	E	PP+A+E	1.56	0.1	0.01	0.00251661	6.76148	0.2763	SD
					A—nonshredded fruits; D—shredded fruits
				Different press, different pretreatment					Fig 2	Table 1	Table 4	Table 7	Fig 5	Fig 8
					Press	Shredded/unshredded	Pretreatment	Sample code	Efficiency	Bx	pH	Density	TPC mg/100ml	DPPH %
					Screw press	A	C	SP+A+C	88.0741	21.4	3.32	1.088	530.594	87.5
					Screw press	A	C	SP+A+C	86.7936	21.3	3.29	1.085	544.883	87.1622
					Screw press	A	C	SP+A+C	88.6198	21.4	3.31	1.084	537.739	86.8944
					Screw press	A	C	SP+A+C	87.8292	21.3667	3.30667	1.08567	537.739	87.1855	Mean
					Screw press	A	C	SP+A+C	0.937381	0.057735	0.0152753	0.00208167	7.14446	0.303463	SD
					Screw press	A	F	SP+A+F	86.9048	18	3.33	1.074	380.829	88.8514
					Screw press	A	F	SP+A+F	87.2215	18.1	3.32	1.071	387.817	88.6824
					Screw press	A	F	SP+A+F	87.0392	18	3.33	1.072	384.323	88.3231
					Screw press	A	F	SP+A+F	87.0552	18.0333	3.32667	1.07233	384.323	88.6189	Mean
					Screw press	A	F	SP+A+F	0.158971	0.057735	0.0057735	0.00152753	3.49383	0.269808	SD
					Piston press	A	C	PP+A+C	35.436	20.7	3.22	1.078	355.213	91.8919
					Piston press	A	C	PP+A+C	35.9316	20.6	3.21	1.075	369.601	92.0608
					Piston press	A	C	PP+A+C	35.3156	20.7	3.21	1.077	362.407	91.5165
					Piston press	A	C	PP+A+C	35.5611	20.6667	3.21333	1.07667	362.407	91.8231	Mean
					Piston press	A	C	PP+A+C	0.326508	0.057735	0.0057735	0.00152753	7.19416	0.278622	SD
					Piston press	A	F	PP+A+F	46.4092	17.8	3.37	1.06	279.961	89.6959
					Piston press	A	F	PP+A+F	47.0716	17.7	3.35	1.063	283.115	89.8649
					Piston press	A	F	PP+A+F	49.6571	17.7	3.34	1.064	281.538	89.3315
					Piston press	A	F	PP+A+F	47.7126	17.7333	3.35333	1.06233	281.538	89.6308	Mean
					Piston press	A	F	PP+A+F	1.71626	0.057735	0.0152753	0.00208167	1.57705	0.272588	SD
					A—nonshredded fruits; D—shredded fruits
			Enzimatic treatmennt, different temperatures, pasteurised/nopasteurised
									Fig 4	Table 3	Table 6	Table 9	Fig 7	Fig 10
			Press	Pretreatment	Shredded/unshredded	Temperature	Jiuce treatmentoku	Sample code	Efficiency	Bx	pH	Density	TPC mg/100ml	DPPH %
			Piston press	E	A	25	U	PP+A+E25+U	0.315529	19.4	3.25	1.076	363.887	91.2162
			Piston press	E	A	25	U	PP+A+E25+U	0.346712	19.6	3.24	1.071	389.386	91.0473
			Piston press	E	A	25	U	PP+A+E25+U	0.332005	19.5	3.26	1.073	376.637	90.6761
			Piston press	E	A	25	U	PP+A+E25+U	0.331415	19.5	3.25	1.07333	376.637	90.9799	Mean
			Piston press	E	A	25	U	PP+A+E25+U	0.0156	0.1	0.01	0.00251661	12.7494	0.2763	SD
			Piston press	E	A	25	P	PP+A+E25+P	0.315529	19.6	3.24	1.076	406.177	90.8784
			Piston press	E	A	25	P	PP+A+E25+P	0.346712	19.4	3.27	1.069	394.686	90.8784
			Piston press	E	A	25	P	PP+A+E25+P	0.332005	19.5	3.26	1.072	400.432	90.424
			Piston press	E	A	25	P	PP+A+E25+P	0.331415	19.5	3.25667	1.07233	400.432	90.7269	Mean
			Piston press	E	A	25	P	PP+A+E25+P	0.0156	0.1	0.0152753	0.00351188	5.74546	0.262343	SD
			Piston press	E	A	45	U	PP+A+E45+U	0.371674	19.5	3.29	1.076	429.331	89.6959
			Piston press	E	A	45	U	PP+A+E45+U	0.333743	19.6	3.3	1.07	427.487	89.6959
			Piston press	E	A	45	U	PP+A+E45+U	0.346505	19.5	3.29	1.073	428.409	89.2475
			Piston press	E	A	45	U	PP+A+E45+U	0.350641	19.5333	3.29333	1.073	428.409	89.5465	Mean
			Piston press	E	A	45	U	PP+A+E45+U	0.0193007	0.057735	0.0057735	0.003	0.922242	0.25893	SD
			Piston press	E	A	45	P	PP+A+E45+P	0.371674	19.5	3.29	1.067	454.535	89.527
			Piston press	E	A	45	P	PP+A+E45+P	0.333743	19.4	3.28	1.074	447.403	89.527
			Piston press	E	A	45	P	PP+A+E45+P	0.346505	19.5	3.28	1.071	450.969	89.0794
			Piston press	E	A	45	P	PP+A+E45+P	0.350641	19.4667	3.28333	1.07067	450.969	89.3778	Mean
			Piston press	E	A	45	P	PP+A+E45+P	0.0193007	0.057735	0.0057735	0.00351188	3.56604	0.258442	SD
			Piston press	E	D	25	U	PP+D+E25+U	0.776589	20.6	3.16	1.075	499.186	87.5
			Piston press	E	D	25	U	PP+D+E25+U	0.754674	20.5	3.15	1.081	486.794	87.6689
			Piston press	E	D	25	U	PP+D+E25+U	0.743531	20.6	3.14	1.078	492.99	87.1465
			Piston press	E	D	25	U	PP+D+E25+U	0.758265	20.5667	3.15	1.078	492.99	87.4385	Mean
			Piston press	E	D	25	U	PP+D+E25+U	0.0168191	0.057735	0.01	0.003	6.19625	0.266568	SD
			Piston press	E	D	25	P	PP+D+E25+P	0.776589	20.4	3.15	1.08	513.009	87.5
			Piston press	E	D	25	P	PP+D+E25+P	0.754674	20.3	3.14	1.078	509.366	87.3311
			Piston press	E	D	25	P	PP+D+E25+P	0.743531	20.4	3.14	1.076	511.187	86.9785
			Piston press	E	D	25	P	PP+D+E25+P	0.758265	20.3667	3.14333	1.078	511.187	87.2698	Mean
			Piston press	E	D	25	P	PP+D+E25+P	0.0168191	0.057735	0.0057735	0.002	1.82159	0.266106	SD
			Piston press	E	D	45	U	PP+D+E45+U	0.754813	21.1	3.2	1.081	562.034	86.3176
			Piston press	E	D	45	U	PP+D+E45+U	0.83796	21	3.19	1.078	553.967	86.4865
			Piston press	E	D	45	U	PP+D+E45+U	0.81402	21	3.18	1.075	558	85.97
			Piston press	E	D	45	U	PP+D+E45+U	0.802264	21.0333	3.19	1.078	558	86.258	Mean
			Piston press	E	D	45	U	PP+D+E45+U	0.0428017	0.057735	0.01	0.003	4.03345	0.263333	SD
			Piston press	E	D	45	P	PP+D+E45+P	0.754813	20.7	3.21	1.08	553.672	85.9797
			Piston press	E	D	45	P	PP+D+E45+P	0.83796	20.6	3.2	1.074	556.276	85.9797
			Piston press	E	D	45	P	PP+D+E45+P	0.81402	20.8	3.2	1.079	554.974	85.5498
			Piston press	E	D	45	P	PP+D+E45+P	0.802264	20.7	3.20333	1.07767	554.974	85.8364	Mean
			Piston press	E	D	45	P	PP+D+E45+P	0.0428017	0.1	0.0057735	0.00321455	1.30199	0.248202	SD
					A—nonshredded fruits; D—shredded fruits
